# Supplementary material for: Association between Seminal Oxidation-Reduction Potential and Sperm DNA Fragmentation—A Meta-Analysis
Source: MDPI journal article supplement (doi:10.3390/antiox11081563), 2022-08-12
Supplement: s1 [file s1]

**Table S2:** Inclusion and exclusion criteria used to identify the relevant articles for meta-analysis

|                                                                                              |
|----------------------------------------------------------------------------------------------|
| <b>Inclusion Criteria</b>                                                                    |
| Clinical trials and observational studies in adult males                                     |
| Measuring seminal oxidative stress using ORP and sperm DNA damage/ integrity using any assay |
| Semen analysis performed based on WHO 5 <sup>th</sup> Edition (2010 guidelines)              |
| Studies reporting correlation between ORP and Sperm DNA damage                               |
| Published articles; Abstracts; Conference Proceedings; Pre-Print Manuscripts; Dissertations  |
| <b>Exclusion Criteria</b>                                                                    |
| Animal studies, <i>in vitro</i> studies, <i>in silico</i> studies                            |
| Meta-analysis, systematic reviews                                                            |
| Case reports studies                                                                         |
| Non-English text articles                                                                    |
