# Supplementary material for: Association between Seminal Oxidation-Reduction Potential and Sperm DNA Fragmentation—A Meta-Analysis
Source: MDPI journal article supplement (doi:10.3390/antiox11081563), 2022-08-12
Supplement: s1 [file s1]

**Table S3:** A modified Newcastle-Ottawa Scale for assessment of study quality

| Category                                         | Scoring Criteria                                                                                                                         |
|--------------------------------------------------|------------------------------------------------------------------------------------------------------------------------------------------|
| <b>Selection</b><br>(Maximum score: 2 stars)     | <b>Representativeness of the cohort</b>                                                                                                  |
|                                                  | Truly representative (1 star)                                                                                                            |
|                                                  | Somewhat representative (1 star)                                                                                                         |
|                                                  | Highly selected group (No star)                                                                                                          |
|                                                  | No description (No star)                                                                                                                 |
|                                                  | <b>Ascertainment of exposure</b>                                                                                                         |
|                                                  | Secure record (1 star)                                                                                                                   |
|                                                  | Directly measured (1 star)                                                                                                               |
|                                                  | Written self-report (No star)                                                                                                            |
|                                                  | No description (No star)                                                                                                                 |
|                                                  |                                                                                                                                          |
| <b>Comparability</b><br>(Maximum score: 2 stars) | <b>Comparability of cohort, controlling of confounders</b>                                                                               |
|                                                  | Controls of key confounders and related factors (eg. Testicular cancer, genetic defects, smoking, environmental exposure, etc.) (1 star) |
|                                                  | Uncontrolled for confounders (No star)                                                                                                   |
|                                                  | <b>Baseline characteristics</b>                                                                                                          |
|                                                  | Demographic and clinical characteristics of study population presented (1 star)                                                          |
| <b>Outcome</b><br>(Maximum score: 6 stars)       | No description (No star)                                                                                                                 |
|                                                  | <b>Assessment of outcome</b>                                                                                                             |
|                                                  | Record linkage (1 star)                                                                                                                  |
|                                                  | Self-report (No star)                                                                                                                    |
|                                                  | No description (No star)                                                                                                                 |
|                                                  | <b>Assessment of oxidative stress and Sperm DNA damage</b>                                                                               |
|                                                  | Assessment of ORP (1 star)                                                                                                               |
|                                                  | Assessment of SDF (1 star)                                                                                                               |
|                                                  | No description (No star)                                                                                                                 |
|                                                  | <b>Adequacy of sample size</b>                                                                                                           |
|                                                  | <b>Number of samples analyzed <math>\geq 100</math></b>                                                                                  |
|                                                  | Number of samples analyzed equal to the number of subjects in the group (1 star)                                                         |
|                                                  | More than or equal to 80% of the sample analyzed or description for the exclusion provided (1 star)                                      |
|                                                  | Less than 80% of the sample analyzed and no description for the exclusion (No star)                                                      |
|                                                  | Number of samples analyzed <100 (No star)                                                                                                |
|                                                  | No description (No star)                                                                                                                 |
|                                                  | <b>Correlation between ORP and SDF</b>                                                                                                   |
|                                                  | Fertile men/ donor group (1 star)                                                                                                        |
|                                                  | Infertile men (1 star)                                                                                                                   |
|                                                  | No description (No star)                                                                                                                 |
|                                                  | Others (No star)                                                                                                                         |

**Good quality:** 2/4 stars for selection, 1/2 stars for comparability, 5/6 stars for outcome

**Fair quality:** 1/4 stars for selection, 1/2 stars for comparability, 4/6 stars for outcome

**Poor quality:** 0/4 stars for selection, 0/2 stars for comparability, 3/6 stars for outcome
