# Supplementary material for: Association between Seminal Oxidation-Reduction Potential and Sperm DNA Fragmentation—A Meta-Analysis
Source: MDPI journal article supplement (doi:10.3390/antiox11081563), 2022-08-12
Supplement: s1 [file s1]

**Table S4:** Grading of studies included for meta-analysis using a modified Newcastle-Ottawa Scale for assessment of study quality

|                    | Selection [Maximum Score =2 stars]                                                                                                           |                                                                                                                               | Comparability [Maximum Score =2 stars]                                                                                                                                                   |                                                                                                                   | Outcome [Maximum Score =6 stars]                                                      |                                                                                               |                                                                                                                                                                                                                                                                                                                        |                                                                                                                        |                                              |
|--------------------|----------------------------------------------------------------------------------------------------------------------------------------------|-------------------------------------------------------------------------------------------------------------------------------|------------------------------------------------------------------------------------------------------------------------------------------------------------------------------------------|-------------------------------------------------------------------------------------------------------------------|---------------------------------------------------------------------------------------|-----------------------------------------------------------------------------------------------|------------------------------------------------------------------------------------------------------------------------------------------------------------------------------------------------------------------------------------------------------------------------------------------------------------------------|------------------------------------------------------------------------------------------------------------------------|----------------------------------------------|
|                    | 1) Representativeness of the cohort [Maximum Score =1 star]                                                                                  | 2) Ascertainment of exposure [Maximum Score =1 star]                                                                          | Comparability of cohort, controlling of confounders [Maximum Score =1 star]                                                                                                              | Baseline characteristics [Maximum Score =1 star]                                                                  | 1) Assessment of outcome [Maximum Score =1 star]                                      | 2) Assessment of oxidative stress and sperm DNA damage [Maximum Score =2 stars]               | 3) Adequacy of sample size [Maximum Score =1 star]                                                                                                                                                                                                                                                                     | 4) Correlation between ORP and SDF [Maximum Score =2 stars]                                                            |                                              |
| <b>Study</b>       | a) Truly representative (1 star)<br>b) Somewhat representative (1 star)<br>c) Highly selected group (No star)<br>d) No description (No star) | a) Secure record (1 star)<br>b) Directly measured (1 star)<br>c) Written self-report (No star)<br>d) No description (No star) | a) Controls of key confounders and related factors (eg. Testicular cancer, genetic defects, smoking, environmental exposure, etc.) (1 star)<br>b) Uncontrolled for confounders (No star) | a) Demographic and clinical characteristics of study population presented (1 star)<br>b) No description (No star) | a) Record linkage (1 star)<br>b) Self-report (No star)<br>c) No description (No star) | a) Assessment of ORP (1 star)<br>b) Assessment of SDF (1 star)<br>c) No description (No star) | a) Number of samples analyzed equal to the number of subjects in the group (1 star)<br>b) More than or equal to 80% of the sample analyzed or description for the exclusion provided (1 star)<br>c) Less than 80% of the sample analyzed and no description for the exclusion (No star)<br>d) No description (No star) | a) Fertile men/donor group (1 star)<br>b) Infertile men (1 star)<br>c) No description (No star)<br>d) Others (No star) | <b>Total Score (Maximum Score =10 stars)</b> |
| <b>Arafa, 2019</b> | 1                                                                                                                                            | 1                                                                                                                             | 1                                                                                                                                                                                        | 1                                                                                                                 | 1                                                                                     | 2                                                                                             | 1                                                                                                                                                                                                                                                                                                                      | 1                                                                                                                      | 9                                            |
| <b>Arafa, 2020</b> | 1                                                                                                                                            | 1                                                                                                                             | 1                                                                                                                                                                                        | 1                                                                                                                 | 1                                                                                     | 2                                                                                             | 1                                                                                                                                                                                                                                                                                                                      | 1                                                                                                                      | 9                                            |

|                            |   |   |   |   |   |   |   |   |    |
|----------------------------|---|---|---|---|---|---|---|---|----|
| <b>Garcia-Segura, 2020</b> | 1 | 1 | 0 | 0 | 1 | 2 | 0 | 1 | 6  |
| <b>Gill, 2021</b>          | 1 | 1 | 1 | 1 | 1 | 2 | 0 | 1 | 8  |
| <b>Homa, 2019</b>          | 1 | 1 | 1 | 0 | 1 | 2 | 0 | 1 | 7  |
| <b>Majzoub, 2018</b>       | 1 | 1 | 1 | 1 | 1 | 2 | 1 | 2 | 10 |
| <b>Tanaka, 2020</b>        | 1 | 1 | 0 | 1 | 1 | 2 | 1 | 1 | 8  |

**Good quality:** 2/4 stars for selection, 1/2 stars for comparability, 5/6 stars for outcome

**Fair quality:** 1/4 stars for selection, 1/2 stars for comparability, 4/6 stars for outcome

**Poor quality:** 0/4 stars for selection, 0/2 stars for comparability, 3/6 stars for outcome
