# Supplementary material for: Association between Seminal Oxidation-Reduction Potential and Sperm DNA Fragmentation—A Meta-Analysis
Source: Antioxidants (Basel). 2022 Aug 12;11(8):1563. doi: 10.3390/antiox11081563 (PMC9404741; doi:10.3390/antiox11081563)
Supplement: Supplementary file 1 [file antioxidants-11-01563-s001.zip]

Archive with 4 entries (4 files):
- antioxidants-1836141-supplementary/Table S1.pdf
- antioxidants-1836141-supplementary/Table S2.pdf
- antioxidants-1836141-supplementary/Table S3.pdf
- antioxidants-1836141-supplementary/Table S4.pdf
